# Supplementary material for: Effectiveness of Live Health Professional–Led Group eHealth Interventions for Adult Mental Health: Systematic Review of Randomized Controlled Trials
Source: PubMed Central journal article supplement (PMC8790691; doi:10.2196/27939), 2022-01-11
Supplement: jmir_v24i1e27939_app1.pdf [file jmir_v24i1e27939_app1.pdf]

## Appendix 1. MEDLINE search strategy

---

1. Mental Health/ [MeSH]
  2. exp Mental Disorders/ [MeSH]
  3. exp Behavioral Symptoms/ or exp Bereavement/
  4. (((mental\* or psychological\*) adj3 (health\* or well\* or disorder\* or ill\*)) or anxi\* or depress\* or neuros\* or psychiatric or stress\* or distress\* or emotion\* or aggress\* or trauma\* or suicid\* or bereav\* or grief or griev\* or mourn\* or addict\* or alcoholism or ((substance\* or drug\* or alcohol\*) adj3 (us\* or misus\* or abus\* or dependen\*))).mp.
  5. or/1-4
  6. exp Videoconferencing/ [MeSH]
  7. exp Telemedicine/ {MeSH}
  8. exp Internet/ {MeSH} or exp Telephone/ [MeSH]
  9. (telehealth or telemedicine or ehealth or video\*).mp.
  10. (Skype or Facetime or Zoom or Google+Hangouts).mp.
  11. (internet or web or online or telephon\* or phone or phoning or phones or phoned or SMS or text messag\* or texting or texted).mp.
  12. (distance or remote).mp.
  13. or/6-12
  14. exp Counseling/ [MeSH] or exp Psychotherapy/ [MeSH] or exp Nursing/ [MeSH] or exp Social Work/ [MeSH] or Yoga/ [MeSH] or Meditation/ [MeSH] or Mindfulness/ [MeSH]
  15. (counsel\* or motivational interview\* or coach\* or psychotherap\* or social work\* or nurs\* or kinesiolog\* or yoga or meditat\* or mindfulness).mp.
  16. or/14-15
  17. 13 and 16
  18. Distance Counseling/ [MeSH]
  19. (e-therap\* or etherap\* or e-counsel\* or ecounsel\* or telepsycholog\* or "tele-mental health" or e-coach\* or ecoach\*).mp.
  20. or/17-19
  21. group\*.mp.
  22. exp Adult/ [MeSH]
  23. adult\*.mp.
  24. or/22-23
  25. exp Randomized Controlled Trial/ [MeSH]
  26. (randomi\* or randomly).mp, pt.
  27. RCT\*.mp
  28. or/22-24
  29. 5 and 20 and 21 and 24 and 28
  30. limit 29 to (yr="2005 -Current" and (english or french))
-
