# Supplementary material for: Effectiveness of Live Health Professional–Led Group eHealth Interventions for Adult Mental Health: Systematic Review of Randomized Controlled Trials
Source: PubMed Central journal article supplement (PMC8790691; doi:10.2196/27939), 2022-01-11
Supplement: jmir_v24i1e27939_app2.pdf [file jmir_v24i1e27939_app2.pdf]

Appendix 2. Effect size calculation summary

| Lead Author (Year) | Calculation of Cohen's <i>d</i>               |                                                                                                                                                                                                                                                                                      |                                                                                       |                                                                                                                           |                                                                                |
|--------------------|-----------------------------------------------|--------------------------------------------------------------------------------------------------------------------------------------------------------------------------------------------------------------------------------------------------------------------------------------|---------------------------------------------------------------------------------------|---------------------------------------------------------------------------------------------------------------------------|--------------------------------------------------------------------------------|
|                    | Conceptual data (int vs. con)                 | Numerical Data                                                                                                                                                                                                                                                                       | Formula                                                                               | Int vs. Passive Con                                                                                                       | Int vs. Active Con                                                             |
| Bogosian (2015)    | Post-intervention outcome scores (means ± SD) | N = 36, int (n = 17) vs con (n = 19); <i>Distress</i> : int (11.43±4.55) vs con (14.87±5.94); <i>Depression</i> : int (5.12±3.2) vs con (7.63±3.96); <i>Anxiety</i> : int (5.48±2.75) vs con (6.58±3.42);                                                                            | $d = (M_2 - M_1) / SD_{pooled}$<br><br>$SD_{pooled} = \sqrt{((SD_1^2 + SD_2^2) / 2)}$ | Depression: $d = 0.65^c$<br><br>Distress: $d = 0.67^c$<br><br>Anxiety: $d = 0.40^b$                                       | N/A                                                                            |
| Cavalera (2019)    | Post-intervention between group changes       | N = 139, int (n = 54) vs con (n = 67); <i>Depression</i> : $F(1,111) = 5.56, p = 0.020$ ; <i>Anxiety</i> : $F(1,111) = 3.96, p = 0.049$ ; <i>QOL</i> : $F(1,110) = 4.68, p = 0.033$                                                                                                  | $d = \sqrt{F((n_t + n_c) / n_t n_c) ((n_t + n_c) / (n_t + n_c - 2))}$                 | N/A                                                                                                                       | Depression: $d = 0.43^b$<br><br>Anxiety: $d = 0.36^b$<br><br>QOL: $d = 0.40^b$ |
| Hall (2017)        | Post-intervention outcome scores (means ± SD) | N = 100, int (n = 56) vs con (n = 44); <i>Distress</i> : int (29.98±1.35) vs con (27.11±1.65)                                                                                                                                                                                        | $d = (M_2 - M_1) / SD_{pooled}$<br><br>$SD_{pooled} = \sqrt{((SD_1^2 + SD_2^2) / 2)}$ | N/A                                                                                                                       | Distress: $d = -1.9^d$                                                         |
| Heckman (2006)     | Post-intervention outcome scores (means ± SD) | N = 90, int (n = 44) vs con (n = 46); <i>Depression</i> : int (14.70±9.10) vs con (14.40±7.60); <i>Engagement Coping</i> : int (2.24±0.56) vs con (2.28±0.53); <i>Avoidant Coping</i> : int (1.91±0.55) vs con (2.03±0.42); <i>Distress</i> : int (40.10±16.80) vs con (39.80±13.10) | $d = (M_2 - M_1) / SD_{pooled}$<br><br>$SD_{pooled} = \sqrt{((SD_1^2 + SD_2^2) / 2)}$ | Depression: $d = 0.04^a$<br><br>Coping: $d_{engagement} = 0.07^a$ ; $d_{avoidant} = 0.25^b$<br><br>Distress: $d = 0.02^a$ | N/A                                                                            |

|                         |                                                                                                                                                                                                              |                                                                                                                                                                                                                                                                                                |                                                                                              |                                                                                                              |                                                                                                                             |
|-------------------------|--------------------------------------------------------------------------------------------------------------------------------------------------------------------------------------------------------------|------------------------------------------------------------------------------------------------------------------------------------------------------------------------------------------------------------------------------------------------------------------------------------------------|----------------------------------------------------------------------------------------------|--------------------------------------------------------------------------------------------------------------|-----------------------------------------------------------------------------------------------------------------------------|
| Heckman (2007)          | Post-intervention outcome scores (means ± SE)                                                                                                                                                                | N = 299, int (n = 108) vs passive con (n = 107) vs active con (n = 84);<br><i>Depression</i> : int (20.23±0.67) vs passive con (20.73 ± 0.66) vs active con (19.09±0.75)                                                                                                                       | SD = SE * √N<br>$d = (X_1 - X_2)/SD_{pooled}$                                                | Depression: d = 0.10 <sup>a</sup><br>Coping: d = -0.15 <sup>a</sup><br>Distress: d = -0.25 <sup>b</sup>      | Depression: d = -0.17 <sup>a</sup><br>Coping: d = -0.24 <sup>b</sup><br>Distress: d = -0.30 <sup>b</sup>                    |
| Heckman (2013)          | Post-intervention outcome scores (means ± SE)                                                                                                                                                                | N = 361, Int <sub>1</sub> (n = 118, 14.36±0.47) vs Int <sub>2</sub> (n = 122, 11.94±0.47) vs con (n = 121, 14.34±0.47)                                                                                                                                                                         | SD = SE * √N<br>$d = (X_1 - X_2)/SD_{pooled}$                                                | Int <sub>1</sub> - Depression: d = 0.02 <sup>a</sup><br>Int <sub>2</sub> - Depression: d = 0.46 <sup>b</sup> | N/A                                                                                                                         |
| Hum (2019) <sup>c</sup> | Post intervention QIDS scores (means ± SE) between int, passive con, and active con. NDDIE & QOL scores reported post-intervention once passive con (wait list) participants had completed the intervention. | <i>Depression (QIDS)</i> : N = 55, int (n= 20; 9.55±1.1), active con (n = 24, 10.63±1.0), passive con (n = 11; 10.73±1.5)<br><i>Depression (NDDIE)</i> : N = 42, int (n=19; 16.05±0.8), active con (n=23; 15.35±0.7); <i>QOL</i> : N = 42, int (n=19; 50.66±3.9), active con (n=23; 49.46±3.5) | SD = SE * √N<br>$d = (X_1 - X_2)/SD_{pooled}$                                                | Depression: d <sub>QIDS</sub> = 0.25 <sup>b</sup>                                                            | Depression: d <sub>QIDS</sub> = 0.23 <sup>b</sup> ;<br>d <sub>NDDIE</sub> = 0.21 <sup>b</sup><br>QOL: d = 0.07 <sup>a</sup> |
| Lepore (2014)           | Changes in depression and anxiety scores                                                                                                                                                                     | N = 183 with int (n=88), con (n=95); <i>Depression</i> : unstandardized regression coefficient (B) = 0.65 (95%CI = 0.48, 0.83); <i>Anxiety</i> : unstandardized regression coefficient (B) = 0.62 (95%CI = 0.45, 0.90)                                                                         | SD = √N *<br>(upper limit of 95% CI - lower limit of 95% CI / 3.92)<br>$X_1 - X_2 \approx B$ | N/A                                                                                                          | Depression: d = 0.52 <sup>c</sup><br>Anxiety: d = 0.51 <sup>c</sup>                                                         |
| Marziali (2006)         | Post-intervention between group changes                                                                                                                                                                      | N = 38, int (n = 23) vs con (n = 15); F (1,37) = 9.68, p < 0.004                                                                                                                                                                                                                               | $d = \sqrt{(F((n_t+n_c)/n_t n_c) ((n_t+n_c)/(n_t+n_c-2)))}$                                  | Distress: d = 1.03 <sup>d</sup>                                                                              | N/A                                                                                                                         |

|                       |                                                                                |                                                                                                                                                                                                                                                                                                                                                                                              |                                                                                   |                                                                                                                                                                                               |                           |
|-----------------------|--------------------------------------------------------------------------------|----------------------------------------------------------------------------------------------------------------------------------------------------------------------------------------------------------------------------------------------------------------------------------------------------------------------------------------------------------------------------------------------|-----------------------------------------------------------------------------------|-----------------------------------------------------------------------------------------------------------------------------------------------------------------------------------------------|---------------------------|
| Park (2020)           | Post-intervention outcome scores (means $\pm$ SD)                              | N = 53, int (n = 31) vs con (n = 22); <i>Depression/Anxiety</i> : int (2.6 $\pm$ 1.6) vs con (3.6 $\pm$ 2.9); <i>Distress</i> : int (3.8 $\pm$ 1.8) vs con (5.6 $\pm$ 1.8)                                                                                                                                                                                                                   | $d = (M_2 - M_1) / SD_{pooled}$<br>$SD_{pooled} = \sqrt{((SD_1^2 + SD_2^2) / 2)}$ | Depression: $d = 0.71^c$<br>Anxiety: $d = 0.71^c$<br>Distress: $d = 0.83^d$                                                                                                                   | N/A                       |
| Paxton (2007)         | Post-intervention intention to treat outcome scores (means $\pm$ SD)           | N = 116, int (n = 37) vs active con (n = 42) vs passive con (n = 37); <i>Depression</i> : int (16.5 $\pm$ 11.7) vs active con (14.2 $\pm$ 12.0) vs passive con (18.4 $\pm$ 11.0)                                                                                                                                                                                                             | $d = (M_2 - M_1) / SD_{pooled}$<br>$SD_{pooled} = \sqrt{((SD_1^2 + SD_2^2) / 2)}$ | Depression: $d = 0.18^a$                                                                                                                                                                      | Depression: $d = -0.19^a$ |
| Thompson (2010)       | Post-intervention between group changes                                        | N = 40, int (n = 26) vs con (n = 27); <i>Depression (BDI)</i> : $F(1,37) = 11.99$ , $p = 0.001$ ; <i>Depression (mBDI)</i> : $F(1,37) = 10.08$ , $p = 0.003$ ; <i>Physical QOL</i> : $F(1,37) = 0.05$ , $p = 0.486$ ; <i>Mental QOL</i> : $F(1,37) = 0.09$ , $p = 0.767$ ; <i>Coping</i> : $F(1,37) = 2.14$ , $p = 0.152$                                                                    | $d = \sqrt{(F((n_t+n_c)/n_t n_c) ((n_t+n_c)/(n_t+n_c-2)))}$                       | Depression: $d_{BDI} = 0.95^d$ ; $d_{mBDI} = 0.87^d$<br>QOL: $d_{physical} = 0.06^a$ ;<br>$d_{mental} = 0.08^a$<br>Coping: $d = 0.40^b$                                                       | N/A                       |
| Thompson (2015)       | Post-intervention between group changes                                        | N = 118, int (n = 62) vs con (n = 56); <i>Depression (mBDI)</i> : $F(1,106) = 4.67$ , $p = 0.033$ ; <i>Depression (BDI)</i> : $F(1,106) = 4.50$ , $p = 0.36$ ; <i>Depression (NDDIE)</i> : $F(1,106) = 0.35$ , $p = 0.555$ ; <i>Anxiety</i> : $F(1, 106) = 2.75$ , $p = 0.10$ ; <i>Physical QOL</i> : $F(1, 105) = 0.74$ , $p = 0.392$ ; <i>Mental QOL</i> : $F(1,105) = 0.28$ , $p = 0.600$ | $d = \sqrt{(F((n_t+n_c)/n_t n_c) ((n_t+n_c)/(n_t+n_c-2)))}$                       | Depression: $d_{BDI} = 0.39^b$ ; $d_{mBDI} = 0.40^b$ ;<br>$d_{NDDIE} = 0.11^a$<br>Anxiety: $d = 0.31^b$<br>QOL:<br>$d_{physical} = 0.16^a$ ;<br>$d_{mental} = 0.10^a$<br>Coping: $d = 0.15^a$ | N/A                       |
| Van der Zanden (2012) | Post-intervention outcome scores (means $\pm$ SD), missing values not replaced | N = 194, int (n = 96) vs con (n = 98); <i>Depression</i> : int (19.1 $\pm$ 10.7) vs con (26.7 $\pm$ 9.4); <i>Anxiety</i> : int (7.8 $\pm$ 4.2) vs con (10.2 $\pm$ 3.5)                                                                                                                                                                                                                       | $d = (M_2 - M_1) / SD_{pooled}$<br>$SD_{pooled} = \sqrt{((SD_1^2 + SD_2^2) / 2)}$ | Depression: $d = 0.84^d$<br>Anxiety: $d = 0.66^c$                                                                                                                                             | N/A                       |

|                  |                                                                                               |                                                                                                                                                                                                                                                                                                                                                                                                                                                                                             |                                                                                   |                                                                                                                                                   |                                                                                                                                                                                                                                                                          |
|------------------|-----------------------------------------------------------------------------------------------|---------------------------------------------------------------------------------------------------------------------------------------------------------------------------------------------------------------------------------------------------------------------------------------------------------------------------------------------------------------------------------------------------------------------------------------------------------------------------------------------|-----------------------------------------------------------------------------------|---------------------------------------------------------------------------------------------------------------------------------------------------|--------------------------------------------------------------------------------------------------------------------------------------------------------------------------------------------------------------------------------------------------------------------------|
| Vazquez (2017)   | Post-intervention outcome scores between two intervention groups and control (means $\pm$ SD) | N = 61, Int <sub>1</sub> (n = 20; 10 $\pm$ 5.7) vs Int <sub>2</sub> (n = 22, 10.9 $\pm$ 5.6) vs con (n = 19, 23.8 $\pm$ 6.9)                                                                                                                                                                                                                                                                                                                                                                | $d = (M_2 - M_1) / SD_{pooled}$<br>$SD_{pooled} = \sqrt{((SD_1^2 + SD_2^2) / 2)}$ | Int <sub>1</sub> - Depression: d = 2.18 <sup>d</sup><br><br>Int <sub>2</sub> - Depression: d = 2.05 <sup>d</sup>                                  | N/A                                                                                                                                                                                                                                                                      |
| Vranceanu (2016) | Unadjusted post-intervention outcome scores (means $\pm$ SD)                                  | N = 63, int (n = 32) vs con (n = 31); <i>Depression</i> : int (13.56 $\pm$ 5.13) vs con (16.35 $\pm$ 5.26); <i>Anxiety</i> : int (10.42 $\pm$ 3.15) vs con (13.68 $\pm$ 3.16); <i>Physical QOL</i> : int (76.34 $\pm$ 19.00) vs con (61.06 $\pm$ 22.21); <i>Psychological QOL</i> : int (67.72 $\pm$ 17.87) vs con (53.36 $\pm$ 20.16); <i>Social QOL</i> : int (63.28 $\pm$ 22.78) vs con (57.53 $\pm$ 22.18); <i>Environment QOL</i> : int (79.68 $\pm$ 17.87) vs con (65.42 $\pm$ 18.66) | $d = (M_2 - M_1) / SD_{pooled}$<br>$SD_{pooled} = \sqrt{((SD_1^2 + SD_2^2) / 2)}$ | N/A                                                                                                                                               | Depression: d = 0.53 <sup>c</sup><br><br>Anxiety: d = 1.03 <sup>d</sup><br><br>QOL:<br>d <sub>physical</sub> = 0.74 <sup>c</sup> ; d <sub>psych</sub> = 0.75 <sup>c</sup> ;<br>d <sub>social</sub> = 0.26 <sup>b</sup> ;<br>d <sub>environment</sub> = 0.78 <sup>c</sup> |
| Wakefield (2016) | Post-intervention outcome scores (means $\pm$ SD)                                             | N = 35, Int (n = 19) vs con (n = 16); <i>Depression</i> : int (6.95 $\pm$ 5.90) vs con (9.38 $\pm$ 6.96); <i>Anxiety</i> : int (5.47 $\pm$ 7.24) vs con (6.80 $\pm$ 8.31); <i>QOL</i> : int (24.52 $\pm$ 2.80) vs con (23.51 $\pm$ 4.69); <i>Distress</i> : int (15.11 $\pm$ 7.89) vs con (16.75 $\pm$ 10.01)                                                                                                                                                                               | $d = (M_2 - M_1) / SD_{pooled}$<br>$SD_{pooled} = \sqrt{((SD_1^2 + SD_2^2) / 2)}$ | Depression: d = 0.38 <sup>b</sup><br><br>Anxiety: d = 0.17 <sup>a</sup><br><br>QOL: d = -0.26 <sup>b</sup><br><br>Distress: d = 0.18 <sup>a</sup> | N/A                                                                                                                                                                                                                                                                      |
| Winter (2007)    | Post-intervention main effects                                                                | N = 94, int (n = 58) vs con (n = 45); F = 4.58, p = 0.121                                                                                                                                                                                                                                                                                                                                                                                                                                   | $d = (M_2 - M_1) / SD_{pooled}$<br>$SD_{pooled} = \sqrt{((SD_1^2 + SD_2^2) / 2)}$ | Depression: d = 0.28 <sup>b</sup>                                                                                                                 | N/A                                                                                                                                                                                                                                                                      |
| Zale (2018)      | Post intervention outcome scores (means $\pm$ SD)                                             | N = 63, int (n = 32) vs con (n = 31); <i>Coping</i> : int (32.66 $\pm$ 9.49) vs con (20.06 $\pm$ 12.23)                                                                                                                                                                                                                                                                                                                                                                                     | $d = (M_2 - M_1) / SD_{pooled}$<br>$SD_{pooled} = \sqrt{((SD_1^2 + SD_2^2) / 2)}$ | N/A                                                                                                                                               | Coping: d = 1.15 <sup>d</sup>                                                                                                                                                                                                                                            |

|                 |                                             |                                                                                                                                                |                                                                                   |                                                                                    |                                                                                                |
|-----------------|---------------------------------------------|------------------------------------------------------------------------------------------------------------------------------------------------|-----------------------------------------------------------------------------------|------------------------------------------------------------------------------------|------------------------------------------------------------------------------------------------|
| Zernicke (2014) | Post-intervention outcome scores (means±SD) | N = 62, int (n = 30) vs con (n=32); <i>POMS</i> : int (18.31±4.10) vs con (37.21±3.55); <i>Distress</i> : int (40.29±3.49) vs con (56.12±3.02) | $d = (M_2 - M_1) / SD_{pooled}$<br>$SD_{pooled} = \sqrt{((SD_1^2 + SD_2^2) / 2)}$ | Depression/Anxiety ( <i>POMS</i> ): $d = 0.90^d$<br><i>Distress</i> : $d = 0.89^d$ | N/A                                                                                            |
| Zerwas (2016)   | Post-intervention effect sizes (Cohen's d)  | N = 179; <i>Depression</i> : $d = 0.07$ ; <i>Anxiety</i> : $d = 0.04$ ; <i>QOL</i> : $d = 0.01$                                                | N/A                                                                               | N/A                                                                                | <i>Depression</i> : $d = 0.07^a$<br><i>Anxiety</i> : $d = 0.04^a$<br><i>QOL</i> : $d = 0.01^a$ |
