# Supplementary material for: Effectiveness of Live Health Professional–Led Group eHealth Interventions for Adult Mental Health: Systematic Review of Randomized Controlled Trials
Source: PubMed Central journal article supplement (PMC8790691; doi:10.2196/27939), 2022-01-11
Supplement: jmir_v24i1e27939_app3.pdf [file jmir_v24i1e27939_app3.pdf]

Appendix 3. Characteristics of included studies (N=21)

| Study                     | Aim                                                                                                                                | Intervention                                      |                                    |                                  |                       | Comparison                                        |                            |                  |                       |
|---------------------------|------------------------------------------------------------------------------------------------------------------------------------|---------------------------------------------------|------------------------------------|----------------------------------|-----------------------|---------------------------------------------------|----------------------------|------------------|-----------------------|
|                           |                                                                                                                                    | Participants, n (% female); age (years; mean, SD) | Details                            | Group size                       | Weeks (contact hours) | Participants, n (% female); age (years; mean, SD) | Details                    | Group size       | Weeks (contact hours) |
| Bogosian et al, 2015 [45] | Assess web-based MBCT <sup>a</sup> to reduce distress related to multiple sclerosis                                                | • 21 (47.4); 53.4 (8.3)                           | • Web-based MBCT                   | • 5                              | • 8 (8)               | 19 (61.9); 50.9 (9.9)                             | WLC <sup>b</sup>           | 5                | 8 (8)                 |
| Cavalera et al, 2019 [46] | Assess web-based MBSR <sup>c</sup> to improve QOL <sup>d</sup> , well-being, sleep, and fatigue for people with multiple sclerosis | • 54 (67); 42.3 (8.4)                             | • Web-based MBSR                   | • 6 (5 patients and 1 caregiver) | • 8 (16)              | 67 (62); 43.2 (9)                                 | Web-based PED <sup>e</sup> | N/A <sup>f</sup> | 8 (NI <sup>g</sup> )  |
| Hall et al, 2017 [47]     | Compare phone vs live delivery of CBSM <sup>h</sup> among people with chronic fatigue syndrome                                     | • 56 (92.9); 50.7 (11.1)                          | • Telephone CBSM                   | • NI                             | • 10 (15-20)          | 44 (86.4); 47.2 (8.3)                             | Live CBSM                  | NI               | 12 (18-24)            |
| Heckman et al, 2006 [48]  | Assess a telephone-delivered coping improvement group intervention on improving QOL in adults living with HIV or AIDS              | • 44 (36.4); 53.5 (3.9)                           | • Telephone-delivered coping group | • 6-8                            | • 12 (18)             | 46 (28.3); 54.7 (3.7)                             | WLC                        | 6-8              | 12 (18)               |

|                                |                                                                                                                                     |                                                                                                           |                                                                                                           |                                                                        |                                                                                |                       |                                                                                                                                                                                  |       |       |
|--------------------------------|-------------------------------------------------------------------------------------------------------------------------------------|-----------------------------------------------------------------------------------------------------------|-----------------------------------------------------------------------------------------------------------|------------------------------------------------------------------------|--------------------------------------------------------------------------------|-----------------------|----------------------------------------------------------------------------------------------------------------------------------------------------------------------------------|-------|-------|
| Heckman and Carlson, 2007 [49] | Assess 2 telephone-delivered mental health interventions for persons living with HIV or AIDS in rural United States                 | <ul style="list-style-type: none"> <li>• 84 (25); 43.7 (8.3)</li> <li>• 108 (35.2); 43.7 (9.1)</li> </ul> | <ul style="list-style-type: none"> <li>• Information support</li> <li>• Coping improvement</li> </ul>     | <ul style="list-style-type: none"> <li>• 8</li> <li>• 8</li> </ul>     | <ul style="list-style-type: none"> <li>• 8 (12)</li> <li>• 8 (12)</li> </ul>   | 107 (28); 41.9 (8.2)  | UC <sup>i</sup> (all services provided by AIDS service organization, eg, case management and support groups, as well as assistance obtaining housing, employment, and childcare) | N/A   | N/A   |
| Heckman et al, 2013 [50]       | Compare 2 telephone-delivered group therapies in reducing depressive symptoms among older adults infected with HIV                  | <ul style="list-style-type: none"> <li>• 118 (37); 58.8 (5.4)</li> <li>• 122 (48); 59.5 (4.9)</li> </ul>  | <ul style="list-style-type: none"> <li>• Coping effectiveness</li> <li>• Supportive-expressive</li> </ul> | <ul style="list-style-type: none"> <li>• 6-8</li> <li>• 6-8</li> </ul> | <ul style="list-style-type: none"> <li>• 12 (18)</li> <li>• 12 (18)</li> </ul> | 121 (31); 58.7 (5.0)  | UC (community-based support services such as AIDS-related support groups, 12-step programs, and individual therapy)                                                              | N/A   | N/A   |
| Hum et al, 2019 [51]           | Examine outcomes of a distance-delivery group intervention program designed to improve emotional well-being in people with epilepsy | <ul style="list-style-type: none"> <li>• 20 (80); 36.9 (2.9)</li> <li>• 24 (62.5); 37.2 (2.6)</li> </ul>  | <ul style="list-style-type: none"> <li>• UPLIFT<sup>j</sup></li> <li>• EpINFO<sup>k</sup></li> </ul>      | <ul style="list-style-type: none"> <li>• 6-8</li> <li>• 6-8</li> </ul> | <ul style="list-style-type: none"> <li>• 8 (8)</li> <li>• 8 (8)</li> </ul>     | 15 (72.7); 29.4 (2.3) | WLC                                                                                                                                                                              | 6-8   | 8 (8) |
| Lepore et al, 2014 [52]        | Compare the mental health benefits of supporting others using an enhanced prosocial ISG <sup>l</sup> vs a standard ISG              | <ul style="list-style-type: none"> <li>• 88 (100); 51.8 (8.4)</li> </ul>                                  | <ul style="list-style-type: none"> <li>• Enhanced Prosocial ISG</li> </ul>                                | <ul style="list-style-type: none"> <li>• 14-17</li> </ul>              | <ul style="list-style-type: none"> <li>• 6 (9)</li> </ul>                      | 95 (100); 52.7 (6.9)  | Standard ISG                                                                                                                                                                     | 14-17 | 6 (9) |

|                                 |                                                                                                                                                |                                                                                                                                       |                                                                                                             |                                                                         |                                                                                      |                                     |                                                  |                 |                             |
|---------------------------------|------------------------------------------------------------------------------------------------------------------------------------------------|---------------------------------------------------------------------------------------------------------------------------------------|-------------------------------------------------------------------------------------------------------------|-------------------------------------------------------------------------|--------------------------------------------------------------------------------------|-------------------------------------|--------------------------------------------------|-----------------|-----------------------------|
| Marziali and Donahue, 2006 [53] | Assess an internet-based psychosocial intervention for family caregivers                                                                       | <ul style="list-style-type: none"> <li>• NI (76); NI</li> </ul>                                                                       | <ul style="list-style-type: none"> <li>• Caring for others</li> </ul>                                       | <ul style="list-style-type: none"> <li>• 4-6</li> </ul>                 | <ul style="list-style-type: none"> <li>• 10 (10) and 12-week peer support</li> </ul> | NI (76); NI                         | No intervention                                  | N/A             | N/A                         |
| Park et al, 2020 [54]           | Assess web-based 3RP <sup>m</sup> for parents of children with learning and attentional disabilities                                           | <ul style="list-style-type: none"> <li>• 31 (83.9); 47 (6.2)</li> </ul>                                                               | <ul style="list-style-type: none"> <li>• Web-based 3RP</li> </ul>                                           | <ul style="list-style-type: none"> <li>• NI</li> </ul>                  | <ul style="list-style-type: none"> <li>• 8 (12) and intake</li> </ul>                | 23 (100); 47 (4.9)                  | WLC                                              | NI              | 8 (12) and intake           |
| Paxton et al, 2007 [55]         | Compare the outcomes of FTF <sup>n</sup> vs internet delivery of an intervention for body dissatisfaction and disordered eating in adult women | <ul style="list-style-type: none"> <li>• 37 (100); 24.6 (SD 0.57)<sup>o</sup></li> <li>• 42 (100); 27.2 (0.67)<sup>o</sup></li> </ul> | <ul style="list-style-type: none"> <li>• Internet</li> <li>• FTF</li> </ul>                                 | <ul style="list-style-type: none"> <li>• NI</li> <li>• NI</li> </ul>    | <ul style="list-style-type: none"> <li>• 8 (12)</li> <li>• 8 (12)</li> </ul>         | 37 (100); 24.8 (0.62) <sup>o</sup>  | WLC                                              | NI              | 8 (12)                      |
| Thompson et al, 2010 [56]       | Evaluate a distance-delivered depression intervention for people with epilepsy                                                                 | <ul style="list-style-type: none"> <li>• 26 (77); 36.4 (34)</li> </ul>                                                                | <ul style="list-style-type: none"> <li>• Telephone intervention</li> <li>• Internet intervention</li> </ul> | <ul style="list-style-type: none"> <li>• 13</li> <li>• 12</li> </ul>    | <ul style="list-style-type: none"> <li>• 8 (8)</li> <li>• Self-guided</li> </ul>     | 27 (85); 35.4 (31)                  | 1. WLC: telephone;<br>2. WLC: internet           | 1. 13;<br>2. 12 | 1. 8 (8);<br>2. Self-guided |
| Thompson et al, 2015 [57]       | Evaluate an MBCT intervention for preventing major depressive disorder episodes in people with epilepsy                                        | <ul style="list-style-type: none"> <li>• 64 (65.3); 41.2 (8.17)<sup>o</sup></li> </ul>                                                | <ul style="list-style-type: none"> <li>• UPLIFT</li> </ul>                                                  | <ul style="list-style-type: none"> <li>• <math>\geq 7</math></li> </ul> | <ul style="list-style-type: none"> <li>• 8 (8)</li> </ul>                            | 64 (65.3); 41.2 (8.17) <sup>o</sup> | UC (antidepressant medication and psychotherapy) | N/A             | N/A                         |
| Van der Zanden et al, 2012 [58] | Evaluate a guided web-based CBT <sup>p</sup> course for young people with                                                                      | <ul style="list-style-type: none"> <li>• 121 (83.5); 20.8 (2.2)</li> </ul>                                                            | <ul style="list-style-type: none"> <li>• Web-based CBT</li> </ul>                                           | <ul style="list-style-type: none"> <li>• <math>\geq 6</math></li> </ul> | <ul style="list-style-type: none"> <li>• 6 (9)</li> </ul>                            | 123 (85.4); 21 (2.3)                | WLC                                              | N/A             | N/A                         |

|                                                   |                                                                                                                   |                                                                                                            |                                                                                          |                                                                    |                                                                                |                       |                                                              |      |         |
|---------------------------------------------------|-------------------------------------------------------------------------------------------------------------------|------------------------------------------------------------------------------------------------------------|------------------------------------------------------------------------------------------|--------------------------------------------------------------------|--------------------------------------------------------------------------------|-----------------------|--------------------------------------------------------------|------|---------|
|                                                   | depressive symptoms                                                                                               |                                                                                                            |                                                                                          |                                                                    |                                                                                |                       |                                                              |      |         |
| Vazquez et al, 2017 [59]                          | Assess CBT through conference call for nonprofessional caregivers                                                 | <ul style="list-style-type: none"> <li>• 20 (90); 59.3 (9.7)</li> <li>• 2. 22 (100); 59.7 (8.1)</li> </ul> | <ul style="list-style-type: none"> <li>• CBT</li> <li>• Behavioral activation</li> </ul> | <ul style="list-style-type: none"> <li>• 5</li> <li>• 5</li> </ul> | <ul style="list-style-type: none"> <li>• 5 (7.5)</li> <li>• 5 (7.5)</li> </ul> | 19 (89.5); 55.9 (5.4) | UC (medical or psychological treatment in community)         | N/A  | N/A     |
| Vranceanu et al, 2016 [60]; Zale et al, 2018 [65] | Assess web-based 3RP for neurofibromatosis vs PED control                                                         | <ul style="list-style-type: none"> <li>• 32 (71); 42.9 (13.5)</li> </ul>                                   | <ul style="list-style-type: none"> <li>• Web-based 3RP</li> </ul>                        | <ul style="list-style-type: none"> <li>• 6-8</li> </ul>            | <ul style="list-style-type: none"> <li>• 8 (12)</li> </ul>                     | 31 (75); 39.9 (11.2)  | Web-based PED                                                | 6-7  | 8 (12)  |
| Wakefield et al, 2016 [61]                        | Assess web-based CBT intervention to assist parents of children who have completed cancer treatment               | <ul style="list-style-type: none"> <li>• 23 (91.3); 42 (5.8)</li> </ul>                                    | <ul style="list-style-type: none"> <li>• Web-based CBT</li> </ul>                        | <ul style="list-style-type: none"> <li>• 3-5</li> </ul>            | <ul style="list-style-type: none"> <li>• 3 (6)</li> </ul>                      | 22 (81.8); 42.8 (5.2) | WLC                                                          | 3-5  | 3 (6)   |
| Winter and Gitlin, 2007 [62]                      | Evaluate telephone-based support groups for female family caregivers of community-dwelling patients with dementia | <ul style="list-style-type: none"> <li>• 58 (100); 68.7 (9.3)</li> </ul>                                   | <ul style="list-style-type: none"> <li>• Telephone support group</li> </ul>              | <ul style="list-style-type: none"> <li>• 5</li> </ul>              | <ul style="list-style-type: none"> <li>• 26 (26)</li> </ul>                    | 45 (100); 64 (8.2)    | UC (letter describing group assignment and next study steps) | N/A  | N/A     |
| Zernicke et al, 2014 [64]                         | Assess a web-based synchronous MBCR <sup>q</sup> group program for cancer survivors                               | <ul style="list-style-type: none"> <li>• 30 (73.3); 58 (8.2)</li> </ul>                                    | <ul style="list-style-type: none"> <li>• Web-based MBCR</li> </ul>                       | <ul style="list-style-type: none"> <li>• 4-11</li> </ul>           | <ul style="list-style-type: none"> <li>• 8 (22)</li> </ul>                     | 32 (71.9); 58 (13)    | WLC                                                          | 4-11 | N/A     |
| Zerwas et al, 2016 [63]                           | Compare webchat-based CBT group therapy for bulimia vs traditional FTF group therapy                              | <ul style="list-style-type: none"> <li>• 89 (98); 28.5 (9.3)</li> </ul>                                    | <ul style="list-style-type: none"> <li>• Web-based CBT</li> </ul>                        | <ul style="list-style-type: none"> <li>• 3-5</li> </ul>            | <ul style="list-style-type: none"> <li>• 20 (30)</li> </ul>                    | 90 (98); 27.5 (9.1)   | FTF CBT                                                      | 3-5  | 20 (30) |

<sup>a</sup>MBCT: mindfulness-based cognitive therapy.  
<sup>b</sup>WLC: wait list control.  
<sup>c</sup>MBSR: mindfulness-based stress reduction.  
<sup>d</sup>QOL: quality of life.  
<sup>e</sup>PED: psychoeducation.  
<sup>f</sup>N/A: not applicable.  
<sup>g</sup>NI: no information.  
<sup>h</sup>CBSM: cognitive behavioral stress management.  
<sup>i</sup>UC: usual care.  
<sup>j</sup>UPLIFT: using practice and learning to increase favorable thoughts.  
<sup>k</sup>EpINFO: epilepsy information.  
<sup>l</sup>ISG: internet support group.  
<sup>m</sup>3RP: relaxation response resiliency program.  
<sup>n</sup>FTF: face to face.  
<sup>o</sup>SD has been calculated as it was not provided in the cited study.  
<sup>p</sup>CBT: cognitive behavioral therapy.  
<sup>q</sup>MBCR: mindfulness-based cancer recovery.
