# Supplementary material for: Effectiveness of Live Health Professional–Led Group eHealth Interventions for Adult Mental Health: Systematic Review of Randomized Controlled Trials
Source: PubMed Central journal article supplement (PMC8790691; doi:10.2196/27939), 2022-01-11
Supplement: jmir_v24i1e27939_app4.pdf [file jmir_v24i1e27939_app4.pdf]

Appendix 4. Risk of bias screening results

| Study                        | Domain 1                       | Domain 2                     | Domain 3                   | Domain 4                   | Domain 5                   | Overall       |
|------------------------------|--------------------------------|------------------------------|----------------------------|----------------------------|----------------------------|---------------|
| Bogosian et al. (2015)       | Low                            | Some Concerns <sup>d,f</sup> | Low                        | High <sup>l</sup>          | Some Concerns <sup>n</sup> | High          |
| Cavalera et al. (2019)       | Some Concerns <sup>b</sup>     | High <sup>d,e,f</sup>        | High <sup>g,i</sup>        | Some Concerns <sup>k</sup> | High <sup>m</sup>          | High          |
| Hall et al. (2017)           | Some Concerns <sup>a,b</sup>   | Some Concerns <sup>d,f</sup> | Low                        | Some Concerns <sup>k</sup> | Some Concerns <sup>n</sup> | Some Concerns |
| Heckman et al. (2006)        | Some Concerns <sup>b</sup>     | Low                          | Some Concerns <sup>j</sup> | High <sup>l</sup>          | Some Concerns <sup>n</sup> | High          |
| Heckman et al. (2007)        | Some Concerns <sup>a,b</sup>   | Low                          | Low                        | Some Concerns <sup>k</sup> | Some Concerns <sup>n</sup> | Some Concerns |
| Heckman et al. (2013)        | Some Concerns <sup>b</sup>     | Low                          | High <sup>h,i,g</sup>      | Some Concerns <sup>k</sup> | Some Concerns <sup>n</sup> | High          |
| Hum et al. (2019)            | Some Concerns <sup>b</sup>     | Some Concerns <sup>d,f</sup> | High <sup>g,i</sup>        | High <sup>l</sup>          | Some Concerns <sup>n</sup> | High          |
| Lepore et al. (2014)         | Low                            | Low                          | Low                        | Some Concerns <sup>k</sup> | Some Concerns <sup>n</sup> | High          |
| Marziali et al. (2006)       | Some Concerns <sup>a,b</sup>   | High <sup>d,e</sup>          | High <sup>g,h</sup>        | High <sup>l</sup>          | Some Concerns <sup>n</sup> | High          |
| Park et al. (2020)           | High <sup>b,c</sup>            | High <sup>d,e,f</sup>        | High <sup>g,i</sup>        | High <sup>l</sup>          | Some Concerns <sup>n</sup> | High          |
| Paxton et al. (2007)         | Some Concerns <sup>b</sup>     | Low                          | High <sup>g,i</sup>        | High <sup>l</sup>          | Some Concerns <sup>n</sup> | High          |
| Thompson et al. (2010)       | Some Concerns <sup>a,b</sup>   | High <sup>d,e,f</sup>        | High <sup>g,h,i</sup>      | High <sup>l</sup>          | Some Concerns <sup>n</sup> | High          |
| Thompson et al. (2015)       | Some Concerns <sup>a,b,c</sup> | Some Concerns <sup>d,f</sup> | High <sup>g,h,i</sup>      | High <sup>l</sup>          | Some Concerns <sup>m</sup> | High          |
| Van der Zanden et al. (2012) | Some Concerns <sup>b</sup>     | Some Concerns <sup>d,f</sup> | Low                        | High <sup>l</sup>          | Some Concerns <sup>n</sup> | High          |
| Vazquez et al. (2017)        | Low                            | Some Concerns <sup>d,f</sup> | Some Concerns <sup>g</sup> | High <sup>l</sup>          | Some Concerns <sup>m</sup> | High          |
| Vranceanu                    | Some                           | Some                         | Low                        | Some                       | Some                       | Some          |

|                         |                              |                                |                            |                            |                            |          |
|-------------------------|------------------------------|--------------------------------|----------------------------|----------------------------|----------------------------|----------|
| et al. (2016)           | Concerns <sup>b</sup>        | Concerns <sup>f</sup>          |                            | Concerns <sup>k</sup>      | Concerns <sup>n</sup>      | Concerns |
| Wakefield et al. (2016) | Low                          | High <sup>d,e</sup>            | High <sup>g,h,i</sup>      | High <sup>l</sup>          | High <sup>m</sup>          | High     |
| Winter et al. (2007)    | Some Concerns <sup>a,b</sup> | Some Concerns <sup>d,e,f</sup> | Some Concerns <sup>j</sup> | High <sup>l</sup>          | Some Concerns <sup>n</sup> | High     |
| Zale et al. (2018)      | Some Concerns <sup>b</sup>   | Some Concerns <sup>f</sup>     | High <sup>h,i</sup>        | Some Concerns <sup>k</sup> | Some Concerns <sup>n</sup> | High     |
| Zernicke et al. (2014)  | Low                          | Some Concerns <sup>d,f</sup>   | Low                        | High <sup>l</sup>          | Low                        | High     |
| Zerwas et al. (2016)    | Low                          | Some Concerns <sup>d,f</sup>   | High <sup>g,h</sup>        | High <sup>l</sup>          | Some Concerns <sup>n</sup> | High     |
